# Supplementary material
Source: PubMed Central journal article supplement (PMC7153752)
Supplement: NIHMS1560140-supplement-1.pdf [file NIHMS1560140-supplement-1.pdf]

## Supplementary Material

| Subject     | fMRE Percent Signal Change |        |        | fMRI Percent Signal Change |        |        |
|-------------|----------------------------|--------|--------|----------------------------|--------|--------|
|             | BD 18s                     | BD 24s | BD 36s | BD 18s                     | BD 24s | BD 36s |
| 1           | 6.6                        | 7.4    | 7.8    | 1.2                        | 1.3    | 1.4    |
| 2           | 6.3                        | 8.5    | 7.5    | 1.3                        | 1.4    | 1.5    |
| 3           | 5.9                        | 6.3    | 6.9    | 1.5                        | 1.7    | 1.9    |
| 4           | 6.6                        | 7.8    | 7.3    | 1.4                        | 1.4    | 1.5    |
| 5           | 6.2                        | 7.5    | 8.3    | 1.1                        | 1.2    | 2.0    |
| 6           | 6.7                        | 8.2    | 7.3    | 1.5                        | 1.5    | 1.7    |
| 7           | 5.5                        | 6.4    | 6.2    | 1.3                        | 1.4    | 1.3    |
| 8           | 6.7                        | 6.7    | 8.0    | 1.5                        | 1.5    | 1.7    |
| 9           | 7.8                        | 9.1    | 9.3    | 1.5                        | 1.4    | 1.5    |
| 10          | 7.2                        | 8.5    | 8.9    | 1.2                        | 1.2    | 1.4    |
| 11          | 8.7                        | 11.4   | 10.4   | 1.5                        | 1.5    | 1.4    |
| Average     | 7.57 ± 1.31                |        |        | 1.44 ± 0.19                |        |        |
| Effect Size | 5.78                       |        |        | 7.58                       |        |        |

**Table S1:** Percent signal change for fMRE and fMRI. The percent signal change was averaged across activated voxels for each run.

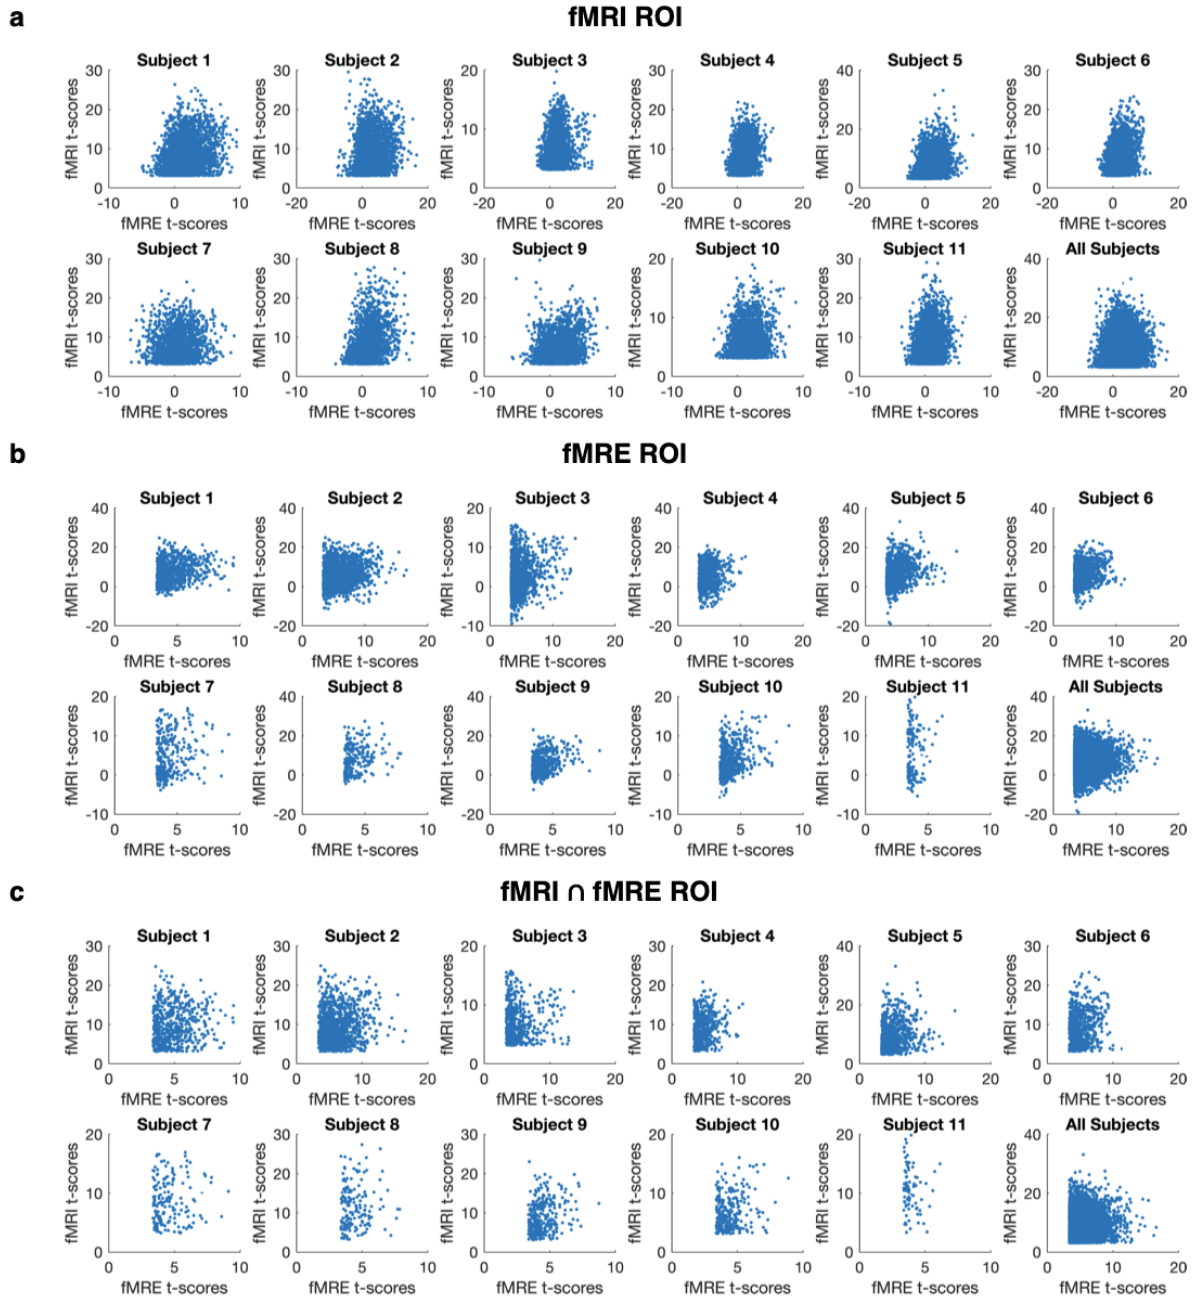

**Figure S1.** Scatter plots for fMRI t-scores vs fMRI t-scores ( $p < 0.001$ ), using voxels that are activated in fMRI (a), in fMRI (b), and in both fMRI and fMRI (c).

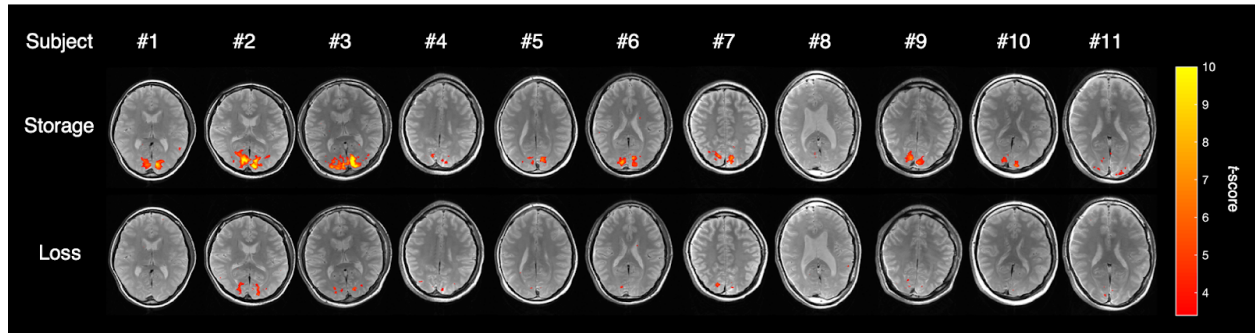

**Figure S2.** fMRI activation ( $p < 0.001$ ) using the storage modulus time series vs the loss modulus time series for all 11 subjects. Most stiffness changes occur in the storage modulus.

| Subject          | 1    | 2    | 3    | 4    | 5    | 6    | 7    | 8    | 9    | 10   | 11   |
|------------------|------|------|------|------|------|------|------|------|------|------|------|
| $G'$<br>(kPa)    | 2.06 | 1.99 | 1.96 | 1.98 | 1.85 | 1.96 | 1.88 | 1.95 | 1.83 | 2.08 | 1.66 |
| $G''$<br>(kPa)   | 0.20 | 0.22 | 0.07 | 0.34 | 0.35 | 0.08 | 0.14 | 0.16 | 0.26 | 0.18 | 0.41 |
| $ G^* $<br>(kPa) | 2.26 | 2.20 | 2.17 | 2.18 | 2.05 | 2.16 | 2.05 | 2.13 | 2.00 | 2.31 | 1.88 |

**Table S2.** Storage modulus ( $G'$ ), loss modulus ( $G''$ ), and stiffness ( $|G^*|$ ) in the ROI defined by the fMRI activation ( $p < 0.001$ ). The storage modulus is significantly larger than the loss modulus for each subject.

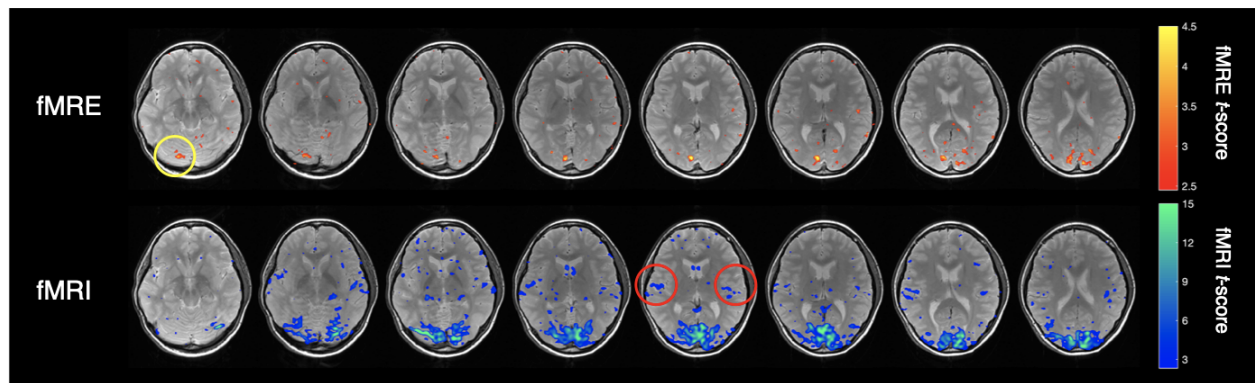

**Figure S3.** fMRI and fMRE activation ( $p < 0.01$ ) for a subject undergoing a sensory-motor task, with a flashing checkerboard at 4 Hz, plungers for passive finger tapping, and atonal sounds at 3 Hz. No significant fMRE activation was detected in the auditory cortex, even though BOLD activation was present (red circles). Weak fMRE activation was observed in the cerebellum (yellow circle).
